# Supplementary material
Source: HighWire-hosted journal article supplement (https://erj.ersjournals.com/content/59/4/2100129)
Supplement: inline-supplementary-material-2 [file inline-supplementary-material-2.pdf]

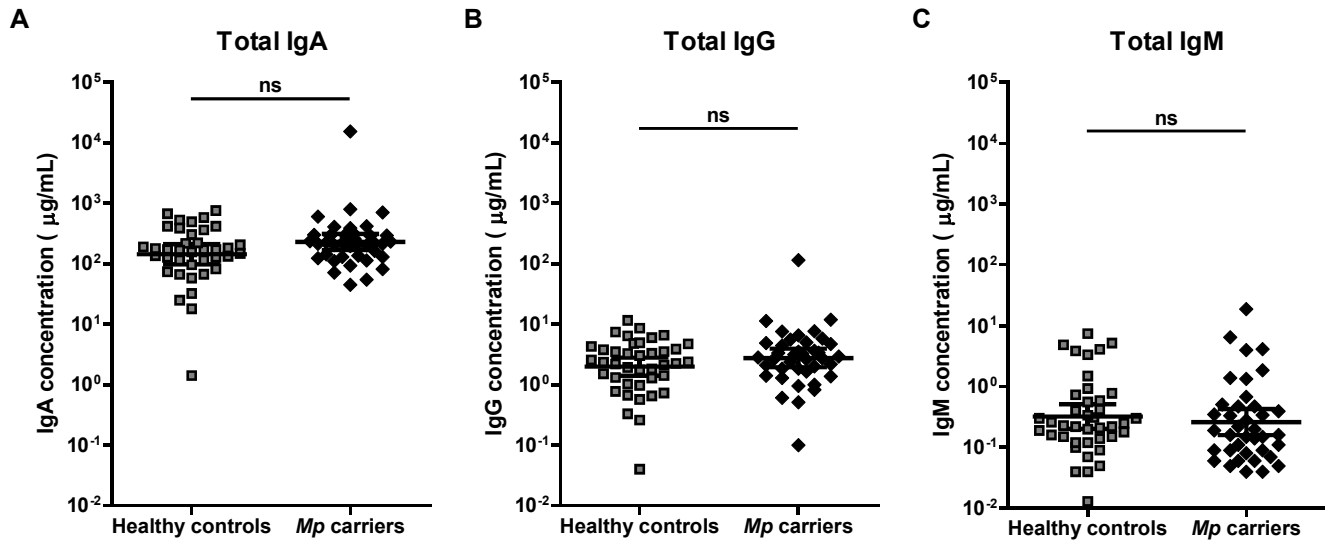

***M. pneumoniae* upper respiratory tract colonization does not increase total antibody levels**

(A-C) Cohort 1 nasal lavage samples of age- and season-matched *M. pneumoniae* carriers (n=39/40) and healthy controls (n=40/40) (A) Levels of total IgA (B) Levels of total IgG (C) Levels of total IgM. Lines and error bars represent geometric means with 95% CI. Ns for non-significant (Paired T-test).
