# Supplementary material
Source: HighWire-hosted journal article supplement (https://erj.ersjournals.com/content/59/4/2100129)
Supplement: inline-supplementary-material-3 [file inline-supplementary-material-3.pdf]

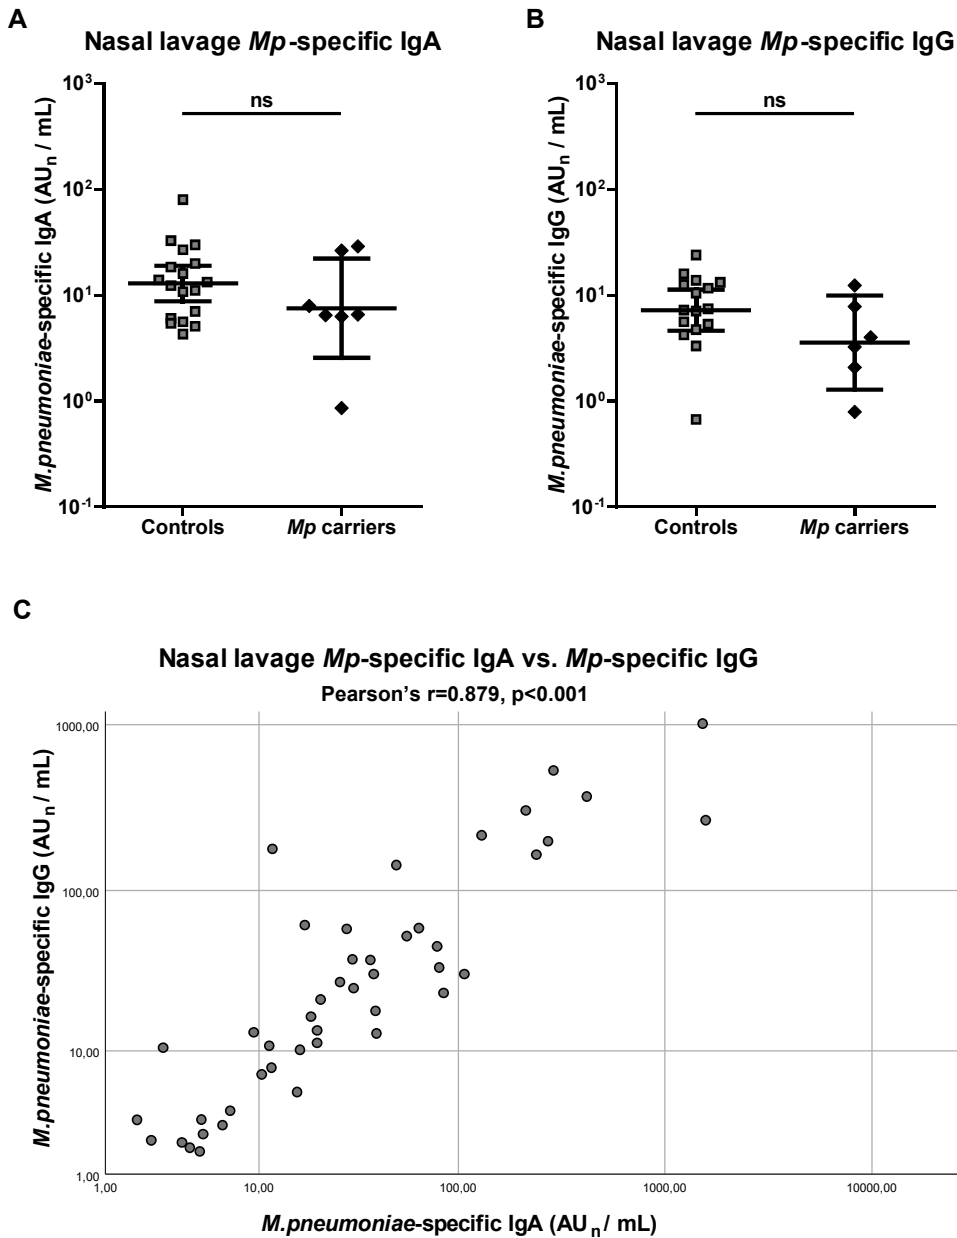

***M. pneumoniae*-specific antibody levels are not different between cohort 2 *M. pneumoniae* carriers and healthy controls.**

(A-B) Cohort 2 nasal lavage samples of *M. pneumoniae* carriers ( $n=6/8$ ) and healthy controls ( $n=16-18/21$ ) (A) Levels of *M. pneumoniae*-specific IgA (B) Levels of *M. pneumoniae*-specific IgG. (C) Nasal lavage levels of specific IgA and IgG of cohort 2 *M. pneumoniae* CAP patients. ( $n=45$ ) Lines and error bars represent geometric means with 95% CI. Ns for non-significant (T-test).
