# Supplementary material
Source: HighWire-hosted journal article supplement (https://erj.ersjournals.com/content/59/4/2100129)
Supplement: inline-supplementary-material-4 [file inline-supplementary-material-4.pdf]

Supplemental Table 1. R.C.A. de Groot et al.

|                                            | Non-carrier controls<br>(n=21) | <i>M. pneumoniae</i> carriers <sup>a</sup><br>(n=8) | <i>p</i> -value     |
|--------------------------------------------|--------------------------------|-----------------------------------------------------|---------------------|
| Sex                                        |                                |                                                     | Ns <sup>b</sup>     |
| Male                                       | 15                             | 7                                                   |                     |
| Female                                     | 6                              | 1                                                   |                     |
| Age <sup>c</sup>                           | 6,2 (3,2-14,1)                 | 5,0 (2,7-7,6)                                       | Ns <sup>d</sup>     |
| Year                                       |                                |                                                     | Ns <sup>b</sup>     |
| 2016                                       | 20                             | 6                                                   |                     |
| 2017                                       | 1                              | 2                                                   |                     |
| URT <i>M. pneumoniae</i> load <sup>e</sup> | 0 (0-0)                        | 663 (386-1271)                                      | <0.001 <sup>f</sup> |

**Supplemental Table 1. Descriptive statistics of cohort 2: Controls vs. *M. pneumoniae* carriers**

a) *M. pneumoniae* carriers defined as *M. pneumoniae* qPCR positive on URT sample, b) chi-squared test, c) Mean age (range) in years, d) t-test with Welch's correction, e) median (Q1-Q3) upper respiratory tract *M. pneumoniae* load, copy numbers/mL, f) independent samples Mann-Whitney U-test
