# Supplementary material
Source: HighWire-hosted journal article supplement (https://erj.ersjournals.com/content/59/4/2100129)
Supplement: inline-supplementary-material-5 [file inline-supplementary-material-5.pdf]

**A. Mucosal IgA antibodies against *M. pneumoniae* proteins**

| Patients:                      | Non-carriers |    |    |    |    | <i>M. pneumoniae</i> carriers |    |    |    |     |
|--------------------------------|--------------|----|----|----|----|-------------------------------|----|----|----|-----|
|                                | #1           | #2 | #3 | #4 | #5 | #6                            | #7 | #8 | #9 | #10 |
| <b>P1</b> <sub>1287-1518</sub> | -            | -  | -  | -  | -  | -                             | -  | -  | -  | +   |
| <b>P1</b> <sub>694-787</sub>   | -            | +  | +  | +  | +  | -                             | ++ | +  | +  | +   |
| <b>P30</b> <sub>17-71</sub>    | -            | -  | -  | -  | -  | -                             | +  | -  | -  | -   |
| <b>P30</b> <sub>98-274</sub>   | -            | -  | -  | +  | -  | -                             | -  | +  | -  | -   |
| <b>P116</b>                    | -            | +  | +  | +  | +  | +                             | +  | +  | -  | +   |

**B. Mucosal IgG antibodies against *M. pneumoniae* proteins**

| Patients:                      | Non-carriers |    |     |    |    | <i>M. pneumoniae</i> carriers |    |    |    |     | Non- <i>M. pneumoniae</i> CAP |     |     |     |     |
|--------------------------------|--------------|----|-----|----|----|-------------------------------|----|----|----|-----|-------------------------------|-----|-----|-----|-----|
|                                | #1           | #2 | #3  | #4 | #5 | #6                            | #7 | #8 | #9 | #10 | #11                           | #12 | #13 | #14 | #15 |
| <b>P1</b> <sub>1287-1518</sub> | -            | -  | +   | +  | -  | -                             | +  | +  | -  | +   | -                             | -   | -   | -   | -   |
| <b>P1</b> <sub>694-787</sub>   | -            | -  | -   | ++ | ++ | -                             | -  | -  | -  | +++ | -                             | -   | -   | -   | -   |
| <b>P30</b> <sub>17-71</sub>    | -            | -  | ++  | +  | +  | -                             | -  | -  | -  | +   | -                             | -   | -   | -   | -   |
| <b>P30</b> <sub>98-274</sub>   | +            | +  | +++ | ++ | +  | +                             | +  | -  | +  | ++  | -                             | +   | +   | +   | +   |
| <b>P116</b>                    | -            | +  | +++ | +  | ++ | -                             | +  | +  | -  | +++ | -                             | -   | +   | -   | +   |

Supplemental Table 2 Nasal lavage specific IgA and IgG antibody levels against *M. pneumoniae* protein fragments P1, P30 and P116 in individual *M. pneumoniae* carriers and non-carriers and non-*M. pneumoniae* CAP patients. Below detection limit: (-), 1-1.5x detection limit: (+), 1.5-2x detection limit: (++) , >2x detection limit: (+++)
